# Supplementary material for: Decadal oscillations of the aquatic chemistry of river waters in Latvia
Source: Copernicus journal article supplement (doi:10.5194/piahs-374-193-2016), 2016-10-17
Supplement: Supplementary file 1 [file Data.xlsx]

## Sheet: Daugava
	t/day					mgPt/l	(m3/sec)
	TOC	Fe tot	Ammonia N	Nitrate N	Phophate P	Color	Discharge
1980-01-01	690.186	5.86225	10.6586	32.0351	0.473717	58	342.677
1980-02-01		5.3	8.15042	25.1639	0.489916	72	257.742
1980-03-01	261.13	3.04062	4.61622	12.6601	0.630239	44	159.966
1980-04-01		4.34536	7.67681	22.4221	0.333144	85	167.645
1980-05-01	2191.58	39.9254	56.3918	106.919	2.12033	93	1305.37
1980-06-01	1993.12	24.4371	36.569	38.3021	1.29985	92	1002.97
1980-07-01	652.308	2.69941	7.04195	12.6168	0.780482	46	339.6
1980-08-01	798.518	9.80362	11.7499	23.644	1.92468	92	417.161
1980-09-01	757.569	13.6059	14.118	19.8237	2.21645	82	423.323
1980-10-01	1361.03	24.0311	22.8868	25.1755	1.71651	118	662.233
1980-11-01		26.9999	38.5373	43.0571	2.69999	148	688.323
1980-12-01	1636.98	36.2073	35.5305	73.7681	1.35354	109	783.3
1981-01-01	1146.81	17.1671	10.1216	66.0884	2.02433	120	574.258
1981-02-01	1191.11	21.6439	8.67952	58.4494	1.36236	88	635.806
1981-03-01	800.801	13.6376	15.1268	32.213	2.58645	64	453.571
1981-04-01	1247.99	20.4863	12.4198	65.8122	1.72853	85	740.968
1981-05-01	2614.55	50.0645	25.0323	124.558	3.01594	89	1745.33
1981-06-01	1081.66	15.4931	5.08728	23.7021	1.80367	77	669.097
1981-07-01	459.969	2.1371	2.30472	5.238	0.201139	68	242.5
1981-08-01	272.636	1.36759	1.77166	3.38791	0.245545	59	179.871
1981-09-01	204.469	0.282249	2.4154	4.64626	0.677398	39	125.645
1981-10-01	292.408	0.645178	1.1501	8.97638	0.779823	38	162.333
1981-11-01	552.821	8.03944	1.46665	19.9899	1.56443	83	314.355
1981-12-01	1206.06	17.9658	10.7081	47.1155	3.9025	107	688.533
1982-01-01	987.364	11.6211	11.3773	51.6853	2.12105	81	470.29
1982-02-01	583.971	11.0102	8.59336	31.4195	1.71867	69	388.516
1982-03-01	531.222	7.4391	10.1851	26.0119	1.37299	66	288.929
1982-04-01	993.159	13.0014	6.73452	79.9724	2.00165	100	541.29
1982-05-01	3151.35	43.6196	10.5744	133.833	5.0559	90	1912.33
1982-06-01	1731.13	19.8896	2.5233	28.9438	1.67725	82	858.968
1982-07-01	838.971	6.99963	1.53838	32.3829	1.7076	49	445.133
1982-08-01	631.357	9.22141	1.5595	22.1043	1.61375	70	392.387
1982-09-01	513.959	6.3178	1.75238	9.68421	1.04682	80	266.871
1982-10-01	242.204	1.5371	5.31471	10.0302	0.836285	90	150.767
1982-11-01	275.07	2.45942	1.89904	14.7876	0.659996	47	180.161
1982-12-01	334.592	4.131	6.00372	27.9806	0.88128	16	255
1983-01-01	735.354	14.5597	6.47097	67.3289	2.07995	106	445.806
1983-02-01	1147.71	17.9513	8.4545	100.064	0.880194	73	670.226
1983-03-01	1162.53	15.0373	5.16549	80.0076	3.99464	69	664.286
1983-04-01	896.511	24.7136	3.51656	95.3378	2.18808	118	565.29
1983-05-01	3387.49	48.0205	8.49594	191.343	10.4537	81	2137.67
1983-06-01	1034.52	11.5573	2.37944	39.9972	1.63162	80	655.71
1983-07-01	446.049	2.74804	1.86157	11.3467	0.833276	57	256.5
1983-08-01	227.275	0.805025	0.32201	6.3597	0.378362	33	155.29
1983-09-01	267.879	0.851848	1.6682	2.61233	0.775182	33	164.323
1983-10-01	157.554	0.413798	1.09657	6.57939	0.782079	18	119.733
1983-11-01	172.903	1.00975	1.90975	7.15608	0.761706	21	127.032
1983-12-01	218.733	1.49909	4.0921	3.38307	0.836652	18	117.233
1984-01-01	228.602	1.79532	1.82654	14.6748	0.942542	27	135.516
1984-02-01	380.251	4.54872	5.32038	32.7752	1.40117	59	235.032
1984-03-01	273.656	1.86146	3.6258	21.5282	0.898356	27	187.345
1984-04-01	237.398	7.39769	1.09402	27.2204	0.781446	89	150.742
1984-05-01	1805.61	20.258	11.0316	72.8086	3.59029	80	1160.73
1984-06-01	740.614	4.98681	1.03726	27.3277	1.45615	62	461.742
1984-07-01	367.592	3.96051	1.29083	14.2285	0.537847	42	226.367
1984-08-01	320.405	2.59233	1.39009	8.60354	1.35628	46	217.419
1984-09-01	214.777	0.813777	0.67606	5.72773	0.500786	46	144.903
1984-10-01	318.96	3.3142	1.16972	11.6972	1.16322	36	188.033
1984-11-01	793.049	18.4016	3.17199	21.0449	1.99266	70	470.677
1984-12-01	611.7	12.4894	1.73464	21.8249	1.55802	113	365.033
1985-01-01	367.607	1.47651	4.66064	19.5959	1.66107	84	222.903
1985-02-01	260.464	2.1827	4.3056	16.8038	1.18703	57	173.032
1985-03-01	221.652		5.41703	12.3997	0.814119	47	144.964
1985-04-01	215.558	5.7812	3.38412	38.1653	0.709724	120	136
1985-05-01	3389.64	65.2015	9.24248	106.541	5.67993	93	1944.97
1985-06-01	1710.18		2.47453	31.8154	4.15367	93	1022.87
1985-07-01	446.482		2.54804	2.14572	0.751	43	310.433
1985-08-01	345.974	1.9147	0.812843	15.2092	0.805618	62	209.065
1985-09-01	347.57		0.222828	4.99136	1.34588	56	206.323
1985-10-01	854.819	9.52612	1.09153	39.5334	2.97691	101	459.4
1985-11-01	1220.27		4.14522	65.1392	3.81953	128	685.387
1985-12-01	1360.64	35.7408	6.26798	76.8161	4.44093	156	771.767
1986-01-01	687.207		9.93174	36.1486	2.20908	73	422.613
1986-02-01	479.385	8.99394	8.1141	37.5399	1.56416	63	282.871
1986-03-01	440.968		9.79233	32.9505	1.85637	62	268.571
1986-04-01	531.795	14.172	9.42797	87.1337	2.54015	104	347.516
1986-05-01	5190.25	71.0004	28.1553	229.16	11.9966	91	2833.67
1986-06-01	1592.89		6.2008	30.1881	2.89643	93	944.323
1986-07-01	426.168	6.14316	1.70034	6.91105	0.797148	41	253.933
1986-08-01	613.463	7.13706	1.42741	16.3439	1.57586	34	330.419
1986-09-01	336.751		0.755652	18.6394	0.638106	88	194.355
1986-10-01	533.962	4.58957	1.14739	19.9359	0.89879	82	276.667
1986-11-01	676.702		1.67407	21.4281	1.0714	94	387.516
1986-12-01	587.444	11.616	3.49114	54.906	1.48532	107	367.333
1987-01-01	628.776		8.76071	15.4238	1.42927	77	357.032
1987-02-01	388.346	5.63019	6.22493	28.2303	0.896073	86	229.452
1987-03-01	283.641		6.76059	22.1141	1.64803	56	182.821
1987-04-01	317.435	4.30883	4.85958	27.0517	1.40928	118	187.484
1987-05-01	2696.86	27.1113	5.48983	121.114	3.2939	85	1466.3
1987-06-01	2880.79		4.5403	74.7814	7.47814	128	1545.58
1987-07-01	2145.02		3.29187	53.2509	4.48599	139	1120.6
1987-08-01	925.986	10.6208	1.02123	32.5885	3.43132	80	525.323
1987-09-01	1562.24		1.95362	34.3836	5.41151	167	904.452
1987-10-01	798.869	16.123	1.60428	15.5615	2.29411	102	464.2
1987-11-01	842.387		5.29585	33.2289	2.50601	81	480.742
1987-12-01	663.402	11.0991	4.11852	48.6544	1.83588	76	403.967
1988-01-01	688.794		4.54419	55.1795	1.75516	67	417.419
1988-02-01	1339	15.0761	4.61791	102.001	3.50418	79	786
1988-03-01	456.217		5.60356	28.423	1.1732	61	268
1988-04-01	549.901	11.6623	8.28025	42.0427	2.04091	98	337.452
1988-05-01	3301.62	35.2224	5.72364	97.566	2.11334	77	2038.33
1988-06-01	1267.16	4.69656	2.28119	26.3008	2.68375	83	776.548
1988-07-01	730.523		2.07222	19.9624	1.80456	43	399.733
1988-08-01	1152.79	22.5394	1.61766	41.5199	3.92552	131	624.097
1988-09-01	909.643		1.08007	25.9217	3.0566	90	500.032
1988-10-01	658.829	7.48512	2.1696	27.4671	1.48401	80	376.667
1988-11-01	630.192		2.77478	31.3704	1.6032	68	356.839
1988-12-01	489.215	6.67832	4.98522	18.9062	1.36858	67	272.167
1989-01-01	426.962		4.49668	48.0228	1.24423	23	252.645
1989-02-01	1215.19	12.7924	16.9769	125.414	1.97266	82	691.871
1989-03-01	1906.9	18.1444	11.6247	172.064	3.92104	84	1067.82
1989-04-01	2461.37	27.0938	6.05006	146.517	1.44675	110	1522.26
1989-05-01	2036.3	23.4019	3.7503	80.2064	1.86015	113	1157.5
1989-06-01	808.367	5.25341	5.87814	20.1262	1.82094	79	493
1989-07-01	576.931	6.03166	5.6443	13.4467	1.26167	65	320.233
1989-08-01	650.645	4.81659	8.8669	10.7552	1.8719	121	380.097
1989-09-01	598.428	5.43077	2.2362	31.786	2.57962	109	369.742
1989-10-01	636.925	6.31181	2.58784	22.1544	1.89354	103	365.267
1989-11-01	577.522	5.64108	4.92313	30.8465	1.93848	78	356.129
1989-12-01	1073.39	12.9157	17.6913	82.5957	3.04985	119	628.1
1990-01-01	1040.84		8.35474	123.516	3.02988	130	596.903
1990-02-01	2011.67	21.6415	15.4025	139.403	4.23082	126	1128.29
1990-03-01	1960.58	36.6262	6.40958	108.963	0.897342	140	1059.79
1990-04-01	3401.76	57.0864	5.67525	125.189	4.10621	108	1931.94
1990-05-01	1362.28		3.38155	47.9666	2.22374	85	850.833
1990-06-01	442.483	3.10107	4.85167	8.90307	0.930321	55	289.452
1990-07-01	446.412		2.3751	6.8724	0.483817	43	254.533
1990-08-01	522.685		4.75915	26.4397	2.33551	73	340.017
1990-09-01	880.451		2.75775	36.8745	3.20693	111	483.613
1990-10-01	1895.96	21.5224	6.52193	65.2193	5.90235	166	943.567
1990-11-01	2597.31		19.1028	112.045	6.64312	151	1417.29
1990-12-01	1719.68	25.779	5.72867	134.624	4.3323	132	1036
1991-01-01	1331.81		6.23264	78.0935	3.63571		858.774
1991-02-01	1120.06	17.338	10.1716	80.6794	2.09212		668.903
1991-03-01	525.268		7.98821	43.0373	2.07446		358.357
1991-04-01	1382.03	12.0712	9.81791	73.7148	4.87676		931.419
1991-05-01	2087.23	20.7537	12.2635	90.3257	4.31583		1364.8
1991-06-01	1461.77		3.61288	53.6287	2.69084		871.161
1991-07-01	1825.8		9.06614	90.1792	4.12317		1116.3
1991-08-01	1094.09	8.32239	3.79248	33.2896	5.36215		609.645
1991-09-01	409.152		2.80765	7.6418	1.30194		262.065
1991-10-01	283.978	2.89538	2.32304	8.1138	0.902281		194.833
1991-11-01	342.26		6.15759	14.6918	1.29633		250.065
1991-12-01	426.397	7.75967	5.4267	15.7729	1.74466		293.5
1992-01-01	369.874	4.02775	5.72364	25.9048	1.37367	107	245.355
1992-02-01	623.919	6.18095	6.80599	28.1268	1.80567	70	401.903
1992-03-01	662.217	5.98203	5.7867	55.23	2.00703	80	423.897
1992-04-01	1266.95	21.7318	11.4613	94.6671	2.56018	124	861.387
1992-05-01	2186.91	31.1869	21.3111	109.674	5.14585	99	1504
1992-06-01	1203	10.9253	7.75342	53.5691	3.01679	115	815.806
1992-07-01	374.958	2.59788	2.1216	13.076	1.11276	72	250.567
1992-08-01	163.56		1.33212	4.9248	0.643857	69	116.803
1992-09-01	120.782		0.639722	5.33102	0.406681	40	88.1452
1992-10-01	142.415	1.15258	0.768384	11.2952	0.38035	37	111.167
1992-11-01	195.678	1.2661	2.24002	13.8784	0.732877	44	140.903
1992-12-01	356.293	3.35228	3.73418	26.7758	1.26029	47	245.567
1993-01-01	502.299	4.49369	4.38135	45.6671	1.34249	50	325.065
1993-02-01	751.69	7.20136	10.2751	75.5264	2.59073	119	508.226
1993-03-01	916.293	16.7218	5.93355	84.0407	2.00662	54	624.321
1993-04-01	1011.81	6.22175	7.91859	101.924	3.14481	126	654.645
1993-05-01	2345	27.29	8.84399	215.288	7.02466	115	1462.3
1993-06-01	727.474		2.30947	64.5602	1.34369	86	486
1993-07-01	257.011	2.4367	1.36693	19.8502	0.597288	50	171.967
1993-08-01	282.084		1.318	21.0237	0.356825	37	186.032
1993-09-01	452.683		3.12342	41.4411	1.24379	87	322.774
1993-10-01	756.429	8.04511	4.82706	69.1879	1.89297	181	547.733
1993-11-01	952.433		6.37607	103.839	2.66429	160	658.903
1993-12-01	628.593	9.02051	7.13249	63.703	1.85305	126	404.667
1994-01-01	526.321		9.73834	55.2651	1.36945	96	352.226
1994-02-01	480.356	5.21206	5.91481	50.3637	1.21224	102	338.903
1994-03-01	319.035	2.5907	3.92307	36.2328	0.69949	68	214.179
1994-04-01	1324.98	11.8644	12.0008	113.462	3.25931	106	789.194
1994-05-01	4512.34	68.7071	17.1768	335.728	6.92276	91	3012.2
1994-06-01	1764.53		8.40129	118.191	3.34142	84	1104.97
1994-07-01	1335.92		5.31579	106.771	3.72105	106	878.933
1994-08-01	474.158	4.03008	2.81045	10.6055	1.07645	109	306.871
1994-09-01	222.42		1.41671	11.1276	0.425013	66	149.065
1994-10-01	235.207		1.2378	17.5824	0.69767	44	162.8
1994-11-01	283.758	2.01541	1.6795	3.02311	0.957318		194.387
1994-12-01	532.817						323.267
1995-01-01	609.608	4.83762	6.2198	65.6534	2.30363		399.935
1995-02-01	518.035	4.0399	4.86859	38.8452	1.47094		359.677
1995-03-01	1083.57	11.3697	7.64872	87.4435	2.00521		717.786
1995-04-01	2363.77	29.4657	15.6296	153.478	3.74086	96	1482.77
1995-05-01	1888.84	19.2774	9.54778	134.214	4.2283		1262.93
1995-06-01	1375.62	8.40291	9.65022	50.2205	3.62376	90	911.774
1995-07-01	636.73	6.7242	4.43658	38.4735	0.928909	60	401.167
1995-08-01	302.964	2.60621	2.43247	5.12555	0.217185		201.097
1995-09-01	214.353	1.72973	1.35907	5.43629	0.160618		143
1995-10-01	232.286	2.59776	1.75349	11.3003	0.759845		150.333
1995-11-01	462.082	3.42577	2.12301	22.4846	1.20143	62	279.226
1995-12-01	454.606	4.41529	3.69541	24.716	1.28139	50	277.733
1996-01-01	374.978	4.19012	4.39963	24.4075	1.02658		242.484
1996-02-01	266.594	3.74986	2.48675	20.3677	0.943387	27	182.742
1996-03-01	229.768	2.46636	4.19714	13.1972	0.986545		150.241
1996-04-01	258.513	3.05105	1.40818	14.6978	0.572071	180	169.774
1996-05-01	1702.88	17.2457	10.2699	92.2355	2.65468	117	1121.37
1996-06-01	1215.12	12.4963	3.12407	45.1255	2.11743		803.516
1996-07-01	435.903	6.39101	2.65473	11.9954	0.771837	58	284.5
1996-08-01	282.207	2.51967	2.93962	3.19159	0.495536		194.419
1996-09-01	223.699	1.8105	1.22855	3.23303	0.39443		149.677
1996-10-01	211.348	2.20113	1.77313	4.95253	0.464682		141.533
1996-11-01	261.807	2.30731	1.97238	20.3937	0.922925		172.29
1996-12-01	474.792	6.93694	3.09237	28.8343	1.37067		290.2
1997-01-01	1038.72	11.2008	7.10297	95.8901	3.7154		632.387
1997-02-01	458.119	3.30338	4.4207	42.1181	1.60311	93	281.129
1997-03-01	572.741	5.26133	5.1431	35.7652	1.61387	123	342.107
1997-04-01	1504.16	14.5256	7.80945	86.2163	3.23311	111	903.871
1997-05-01	1444.35	13.0596	9.60264	85.2714	1.92053		889.133
1997-06-01	1150.56	5.81645	4.84704	36.8375	1.64799		748
1997-07-01	1303.04	9.43246	3.70561	25.9393	1.17906		779.8
1997-08-01	883.235	6.02648	4.92163	17.1755	1.80795	55	581.258
1997-09-01	335.028	2.07134	2.66315	8.18673	0.384678		228.323
1997-10-01	231.264	1.73107	1.2983	15.5364	0.380836		150.267
1997-11-01	834.004	17.5156	3.88129	59.4136	1.67194		460.742
1997-12-01	1373.29	26.8034	9.29186	76.1218	2.39444		827.267
1998-01-01	737.44	13.9491	6.879	41.8473	1.1465		442.323
1998-02-01	1345.53	22.8986	10.9229	52.2457	3.48743	107	761.581
1998-03-01	1306.15	28.1087	5.03683	50.3683	2.32344	97	752.214
1998-04-01	1778.79	22.2849	8.61684	54.0781	2.43649		1031.71
1998-05-01	1873.28	24.3762	2.45651	40.249	2.24865	107	1093.53
1998-06-01	1341.39	19.973	1.08943	15.2521	1.52521		840.613
1998-07-01	1007.91	16.1766	3.44748	10.8728	1.64418		613.867
1998-08-01	1563.23	9.87958	3.60683	18.6614	3.9832	151	907.516
1998-09-01	1546	25.7101	6.62632	14.843	3.18063		920.323
1998-10-01	1103.9	25.2312	4.1074	10.9531	1.70164		679.133
1998-11-01	1561.69	40.399	5.43832	32.2415	2.91339		899.194
1998-12-01	1623.65	35.4317	14.6477	43.7453	2.3951		916.4
1999-01-01	602.148	15.8187	5.79497	55.757	1.34694		362.548
1999-02-01	774.012	21.8644	7.25966	36.6399	2.12665	102	494.258
1999-03-01	531.412	13.1249	7.09045	14.9352	1.53878		349.214
1999-04-01	1045.91	29.442	7.86537	65.0487	1.5837	139	615.097
1999-05-01	4655.85		8.58917	104.297	9.32538		2840.33
1999-06-01	1285.82	24.6171	1.44806	16.6527	0.868838		838
1999-07-01	361.514	2.33994	0.451567	3.65359	0.238099	46	237.567
1999-08-01	239.039	1.43909	0.196239	0.130826	0.163533		151.419
1999-09-01	172.34	0.76903	0.153806	0.102537	0.123045		118.677
1999-10-01	186.251	2.68272	0.772623	2.53249	0.154525	46	124.2
1999-11-01	222.231	1.97772	0.865254	4.44988	0.358462		143.065
1999-12-01	240.195	2.89974	2.57754	9.40803	0.476845		149.163
2000-01-01	356.207	7.07967	3.66626	26.612	0.714288		219.484
2000-02-01	406.235	9.73143	4.11069	23.2799	0.943781	115	242.742
2000-03-01	630.827	5.91769	3.12633	57.5021	0.83741		387.69
2000-04-01	1023.93	11.6056	4.86045	76.676	1.10104	140	574.032
2000-05-01	2907.21	49.4806	12.8283	53.8789	3.37201		1696.87
2000-06-01	889.119	4.34618	3.51038	6.35211	0.9361		580.419
2000-07-01	292.983	1.0961	0.678538	1.77464	0.125268		181.233
2000-08-01	761.281	23.1337	1.25246	13.9244	1.74608	300	426.355
2000-09-01	1338.2	17.7166	3.14702	29.1391	2.44768		809.419
2000-10-01	867.724	16.7346	4.36044	19.3273	2.10951		545.6
2000-11-01	389.479	4.8144	1.5225	13.5379	0.79417	113	238.129
2000-12-01	712.019	8.80962	2.6338	28.9718	1.58028		420.467
2001-01-01	803.622						523.742
2001-02-01	636.992	12.0189	2.40379	45.0538	2.96009	87	397.452
2001-03-01	906.416	11.6949	5.90902	44.3176	2.14202		569.929
2001-04-01	1919.73	20.5115	8.58621	102.796	4.81782		1104.19
2001-05-01	2786.25	62.2276	10.5254	91.3146	3.78344	154	1646.23
2001-06-01	1121.45	10.2587	4.16762	13.6249	2.74101		742.097
2001-07-01	674.214	5.86958	1.09007	5.61803	1.14038		388.2
2001-08-01	424.882	4.34578	2.70906	9.75261	1.27326	63	261.29
2001-09-01	338.763	2.06666	1.12727	7.42119	0.803179		217.452
2001-10-01	307.966	2.03622	0.460362	9.84467	0.65159	39	204.933
2001-11-01	264.184						216.871
2001-12-01	608.058	8.02881	2.73145	34.6811	2.43347		383.2
2002-01-01	400.436	0.736262	2.45421	3.98127	1.1862	36	315.613
2002-02-01	450.24	2.95601	4.91783	42.3252	1.17758	180	279.29
2002-03-01	2349.92	36.4242	16.1952	178.208	3.88325		1393.64
2002-04-01	2792.96	63.9585	7.20859	112.722	2.40286		1635.94
2002-05-01	1733.99	35.6405	3.19005	38.0166	2.41124	160	1018.53
2002-06-01							435.871
2002-07-01	279.455	2.55571	0.762955	1.95938	0.189799		174
2002-08-01	229.439	2.86592	0.489811	0.199963	0.294408	51	150.774
2002-09-01	131.382	0.422169	0.746573	0.0575335	0.101987		102.868
2002-10-01	103.695	0.162073	0.287101	2.33617	0.0972438		80.3933
2002-11-01	146.137	1.24214	0.726621	4.72193	0.271094		102.874
2002-12-01	235.989	3.46326	3.07626	12.3969	1.09047		151.833
2003-01-01		0.281215	4.18542	7.88106	0.34941		108.494
2003-02-01		0.466925	3.82593	8.45706	0.264432		110.29
2003-03-01		0.412745	3.61152	13.2336	0.67845		119.429
2003-04-01		1.22911	4.50674	8.19406	0.266307		237.097
2003-05-01	740.599	11.67	1.8515	55.8816	0.875254		519.5
2003-06-01		14.0921	3.87533	58.6584	2.92411		815.516
2003-07-01		5.66974	0.88196	9.55981	1.33869		364.567
2003-08-01	536.118	5.04186	2.54614	9.68037	2.11758		389.032
2003-09-01	309.967	3.5725	0.896628	10.4548	1.23461		243.226
2003-10-01		5.12594	0.904159	12.6725	1.52354		329.6
2003-11-01		10.1938	2.18147	17.1256	1.55965		471.935
2003-12-01		19.2228	2.08944	33.0132	1.33724		483.667
2004-01-01	877.346	16.1841	5.94125	37.9048	1.57582		492.935
2004-02-01	602.971	11.1074	5.05385	31.4973	1.23768		367.307
2004-03-01	810.171	18.7053	7.37688	59.8568	1.9017		541.24
2004-04-01	1444.77	47.6625	10.9971	145.47	3.25197		1149.27
2004-05-01	3281.25	59.2997	10.3445	100.809	3.80836		2287.8
2004-06-01		10.1517	1.3977	8.0331	0.471172		510.855
2004-07-01	335.076	1.90114	1.62191	4.88356	0.428351		275.049
2004-08-01		1.61655	0.624168	2.42033	0.465656		207.89
2004-09-01	236.117	0.605428	0.671016	1.82385	0.372338		175.182
2004-10-01		0.750223	0.686454	4.06246	0.476391		173.663
2004-11-01		1.04337	0.686883	8.09044	0.569504		201.267
2004-12-01		12.995	3.28697	38.2206	1.2995		442.368
2005-01-01							552.041
2005-02-01	1472.25		7.24827	68.7174	7.38759		871.605
2005-03-01	548.136		8.65479	27.0359	3.79986		381.604
2005-04-01	563.985		4.30039	47.0223	1.33242		326.38
2005-05-01			4.63897	138.849	5.15085		1481.15
2005-06-01			2.87482	65.7614	7.29485		1663.67
2005-07-01			1.33723	21.8351	3.49591		884.414
2005-08-01			1.41865	16.1171	1.56601		346.891
2005-09-01							263.423
2005-10-01			0.348564	2.97391	0.393061		171.672
2005-11-01			1.38063	6.40874	0.509963		143.96
2005-12-01			2.83618	10.016	0.613776		156.129
2006-01-01			2.98667	10.4285	0.496596		164.218
2006-02-01			3.66991	13.4548	0.668101		161.097
2006-03-01			3.20919	9.9576	0.432444		131.714
2006-04-01			3.55327	9.7278	0.361152		134.839
2006-05-01			3.91865	59.9724	2.09562		1183.17
2006-06-01			2.41873	20.0877	1.63982		474.484
2006-07-01			1.00458	5.95308	0.688324		430.633
2006-08-01			1.03386	2.78977	0.291285		142.452
2006-09-01			4.13743	6.77834	1.29405		203.774
2006-10-01			9.39192	36.0176	4.96951		1055.37
2006-11-01			2.29621	29.6594	2.3281		553.677
2006-12-01			5.28464	57.7138	2.71185		804.8
2007-01-01			2.99923	66.7655	1.69522		603.71
2007-02-01			4.42183	109.776	2.83789		1018.48
2007-03-01			6.17404	42.0233	1.45389		461.024
2007-04-01			4.89069	70.4834	2.01381		1109.91
2007-05-01	912.953		3.62333	28.0057	1.9778		732.519
2007-06-01	892.388		2.26638	26.3467	2.97463		655.782
2007-07-01			0.946247	4.20554	0.672887		243.376
2007-08-01			0.363193	2.65829	0.448387		148.276
2007-09-01			0.366656	3.37087	0.484932		136.894
2007-10-01			0.127795	3.47601	0.189136		118.328
2007-11-01			1.36902	7.94414	0.601595		178.536
2007-12-01	292.295		3.44908	18.4146	0.34101		225.536
2008-01-01
2008-02-01			5.10124	34.4143	1.104		352.49
2008-03-01			14.2654	148.107	3.18603		996.63
2008-04-01	1669.45		4.36101	97.782	2.21458		1183
2008-05-01	628.992		2.91892	21.8182	1.4054		455
2008-06-01	865.469		1.41085	16.4851	1.51114		477
2008-07-01			0.448416	1.49472	0.239155		173
2008-08-01	174.182		0.370138	1.18195	0.3888		144
2008-09-01			1.22514	10.0792	1.28597		301.7
2008-10-01
2008-11-01	628.733		1.32365	18.6138	1.48083		383
2008-12-01	1200.98		3.68301	58.5622	2.63072		794.3
2009-01-01	381.462		3.20197	19.1887	0.473938		267.58
2009-02-01			3.3696	22.2912	1.17504		300
2009-03-01							378.01
2009-04-01			11.9426	335.986	4.5382		1843
2009-05-01	664.485		8.09309	13.9144	1.32045		493
2009-06-01							361.46
2009-07-01
2009-08-01	369.075		2.54534	9.33293	0.89087		245.5
2009-09-01			1.35406	3.04664	0.693956		195.9
2009-10-01	1907.69		6.15384	120.615	5.78461		1424.5
2009-11-01			3.92256	41.5791	2.66734		908
2009-12-01
2010-01-01							512.22
2010-02-01							277.12
2010-03-01							287.25
2010-04-01							3692
2010-05-01							717.35
2010-06-01
2010-07-01			2.44166	9.22406	1.24796		314
2010-08-01					0.350438		156
2010-09-01			2.70121	16.2073	1.41814		390.8
2010-10-01			1.58143	11.07	0.609981		261.48
2010-11-01							260.49
2010-12-01							342.04
2011-01-01
2011-02-01			6.32513	30.7823	1.39153		488.05
2011-03-01							353.27
2011-04-01							1992.44
2011-05-01	3093.53		9.55865	61.6967	5.82209		2011.5
2011-06-01	361.76		1.1861	10.6749	0.573281		228.8
2011-07-01							162.93
2011-08-01
2011-09-01			0.572936	1.71881	0.458349		165.78
2011-10-01			1.2649	5.48122	0.474336		183
2011-11-01
2011-12-01
2012-01-01
2012-02-01							267.46
2012-03-01							259.45
2012-04-01
2012-05-01
2012-06-01
2012-07-01							546.98
2012-08-01	438.958		1.25417	11.6533	1.26462		241.93
2012-09-01
2012-10-01
2012-11-01
2012-12-01
2013-01-01	656.539		6.56539	31.2821	1.37101		446.99
2013-02-01	492.714		6.77751	26.1418	1.11883		373.54
2013-03-01	321.282		4.84741	16.5714	0.834205		260.95
2013-04-01
2013-05-01	4431.25		15.164	123.839	8.84565		2925.15
2013-06-01	1416.18		4.99408	28.8943	3.38884		825.74
2013-07-01	290.948		1.47315	6.99748	0.801028		213.13
2013-08-01
2013-09-01				1.52755	0.317731		141.44
2013-10-01
2013-11-01
2013-12-01
2014-01-01
2014-02-01	398.631		4.94945	23.9446	1.31093		309.65
2014-03-01			10.5511	77.1043	3.20592		939.38
2014-04-01
2014-05-01
2014-06-01	285.151		0.653471	11.1684	0.271572		196.45
2014-07-01
2014-08-01
2014-09-01			0.4828	3.65249	0.370847		161.97
2014-10-01
2014-11-01	229.554		2.10815	11.4621	0.49971		180.74
2014-12-01

## Sheet: Lielupe
	t/day					mgPt/l	(m3/sec)
	TOC	Fe Tot	Phosphate P	Ammonia N	Nitrate N	Color	Discharge
1980-01-01		1.00376	0.29542	1.01031	21.6769	57	44.4053
1980-02-01	34.4548	0.778297	0.101795		8.62711	52	22.0909
1980-03-01	45.66	0.117712	0.244453	1.10972	10.6471	68	24.234
1980-04-01	518.938	0.558427	1.49987	5.37689	191.87	75	327.54
1980-05-01	142.244	0.707832	0.29373	3.56036	46.4216	84	95.095
1980-06-01	71.3606	0.530836	0.191535	1.32798	12.9861	64	35.4695
1980-07-01	204.683	0.59516	1.77344	3.36881	30.969	75	111.403
1980-08-01	143.041	0.590598	0.69987	3.75597	31.6341	86	81.0035
1980-09-01	308.251	0.382957	0.894408	6.97254	57.0546	119	166.967
1980-10-01	547.51	0.978856	1.9728	17.2549	116.988	125	266.279
1980-11-01	557.719	0.645946	0.944928	7.71514	83.9818	132	245.768
1980-12-01	593.088	1.03298	1.45648	5.66082	93.2856	89	272.995
1981-01-01	319.426	0.703305	0.488267	2.79634	74.0593	97	151.711
1981-02-01	206.342	1.04041	1.36484	5.62366	32.4624	60	109.7
1981-03-01	728.936	1.231	9.06591	13.1769	126.433	76	378.124
1981-04-01	390.837	0.812191	1.07436	2.57845	70.2628	104	198.955
1981-05-01	141.719	0.968349	0.194824	0.889936	23.7938	108	83.515
1981-06-01	79.0351	1.29255	0.329523	0.788272	3.59568	83	44.8697
1981-07-01	44.3996	0.3912	0.216415	0.18351	3.64489	58	21.972
1981-08-01	34.1376	0.949091	0.242267	0.0371291	1.7265	61	21.4867
1981-09-01	61.1546	0.80118	0.329922	0.29068	9.52703	60	33.6435
1981-10-01	133.116	0.373548	0.317104	0.601144	5.78601	82	69.5769
1981-11-01	271.305	0.604037	1.15404	2.1509	56.5853	115	191.498
1981-12-01	213.027	0.695329	0.779701	1.19954	38.2353	107	138.836
1982-01-01	139.834	0.570139	0.401263	0.565159	17.9014	60	65.4119
1982-02-01	77.7923	0.483513	0.461397	2.05504	5.30557	60	45.7408
1982-03-01	1091.15	0.652781	2.7267	21.1693	42.2236	90	532.642
1982-04-01		0.443268	0.675574	2.7481	55.0764	92	265.056
1982-05-01	123.676	0.616582	0.0751875	1.15975	9.52374	99	68.253
1982-06-01	77.8254	0.386795	0.150559	0.705591	2.83976	97	34.5066
1982-07-01		0.281306	0.102656	0.63478	1.5324	75	34.439
1982-08-01	38.5881	0.559489	0.167634	0.336615	0.853318	57	23.376
1982-09-01	38.3374	0.592641	0.252781	0.406954	0.837386	46	18.1158
1982-10-01	20.0263	0.334421	0.149932	0.308753	0.453773	44	10.8289
1982-11-01	24.6472	0.27205	0.201425	0.233536	0.909444	49	15.594
1982-12-01	56.7295	0.757196	0.769599	0.499971	2.45522	47	41.3336
1983-01-01	217.96	0.518836	1.3151	1.10066	8.0557	99	131.784
1983-02-01	266.516	0.756831	0.888903	2.65061	21.5268	88	131.479
1983-03-01	524.821	0.768646	1.55029	9.33799	37.5333	24	314.792
1983-04-01	789.639	0.401639	0.991106	3.77564	48.7058	75	436.996
1983-05-01	226.389	0.285293	0.586664	1.83537	19.5008	78	151.734
1983-06-01	191.338	0.74207	1.25348	1.00461	23.1061	90	105.704
1983-07-01	72.5645	0.264982	0.193571	0.864008	1.27109	48	38.4619
1983-08-01	39.3762	0.414245	0.1328	0.366895	0.819532	34	27.6944
1983-09-01	29.3034	0.240584	0.18217	0.383281	0.568236	37	15.4748
1983-10-01	18.8006	0.380062	0.262388	0.415145	0.28113	22	13.9949
1983-11-01	25.9198	0.333927	0.243668	0.302749	1.29798	36	15.6897
1983-12-01	99.7388	0.297869	0.913902	2.97475	6.66934	37	55.2353
1984-01-01	163.345	0.68608	0.853992	4.13365	14.9369	77	88.055
1984-02-01	84.4259	0.646858	0.418994	1.58383	4.50671	85	49.9945
1984-03-01	65.1505	0.386348	0.643443	2.03649	5.21037	54	50.1499
1984-04-01	509.771	0.522982	1.8737	4.38568	66.49	79	271.929
1984-05-01	73.7522	0.400687	0.227978	0.946574	14.8386	72	46.2918
1984-06-01	31.7878	0.380754	0.196771	0.501496	0.121415	59	18.3295
1984-07-01	17.3262	0.111041	0.117491	0.0986569	0.110615	48	10.3806
1984-08-01	17.2676	0.82645	0.185463	0.183531	0.367063	40	11.18
1984-09-01	27.8422	0.675629	0.206759	0.246328	0.581754	48	18.198
1984-10-01	93.0413	0.407277	0.673183	1.21005	5.10057	55	53.1841
1984-11-01	64.508	0.403909	0.506597	0.500844	9.47542	66	47.0011
1984-12-01	111.862	0.648216	0.60434	3.41511	15.9874	55	77.5034
1985-01-01	44.5896	1.32746	0.277248	0.659274		75	27.2517
1985-02-01	26.9857		0.298215	0.823061		14	20.1257
1985-03-01	127.463	0.274186	1.02226	5.87544	13.7906	46	82.5945
1985-04-01	671.803	0.707969	8.49499	16.5049	212.611	97	437.471
1985-05-01	307.776	0.465379	1.14658	0.170495	160.052	82	197.332
1985-06-01	91.3167		0.471394	0.101844		71	50.5181
1985-07-01	43.6774	0.802057	0.317851	0.809227	2.42768	54	28.9672
1985-08-01	34.1503		0.106369	0.0614205		54	19.3878
1985-09-01	54.0996	0.70763	0.572293	0.263773	5.79358	53	32.7099
1985-10-01	162.051	0.700434	1.13371	0.183503	23.0354	75	79.6455
1985-11-01	179.366	1.24662	0.819454	0.450249	17.2896	94	104.224
1985-12-01	210.368	0.570403	1.44652	1.64742	50.6281	80	139.517
1986-01-01	79.7109		0.412052	1.78631		72	52.1216
1986-02-01	71.9546		0.594128	1.46481		65	40.6893
1986-03-01	562.519	0.526469	3.85954	20.5264	127.567	68	334.611
1986-04-01	842.643	1.22354	9.10977	10.7449	135.829	60	540.703
1986-05-01	119.768	0.831788	0.677962	0.119993	37.7979	108	69.4405
1986-06-01	59.6763		0.153289	0.111483		69	32.2578
1986-07-01	42.9676	0.476939	0.544438	0.375359	0.931694	53	23.2737
1986-08-01	40.7213	0.594446	0.127125	0.0300531	1.06388	62	20.8702
1986-09-01	101.469		0.400262	0.158834		46	55.1507
1986-10-01	108.76	0.524525	0.663192	0.22067	7.55006	88	54.7296
1986-11-01	225.067	0.579989	1.43708	0.586565	23.096	97	113.149
1986-12-01	181.894	1.15065	0.769612	0.46272	21.5573	96	94.5098
1987-01-01	46.6854		0.202716	0.175943	9.455	86	26.5614
1987-02-01	71.0283		0.330782	0.502298	9.4089	48	42.5388
1987-03-01	111.663	0.96351	0.822424	0.740382	20.7707	67	69.4803
1987-04-01	768.46	1.17858	3.56784	4.93035	114.231	51	462.683
1987-05-01	189.544	0.91813	0.543046	2.25007	30.8952	87	100.163
1987-06-01	221.954	1.64649	0.412877	1.80417	19.5163	97	120.471
1987-07-01	73.4056		0.214312	0.241965	3.31838	60	40.0074
1987-08-01	73.104	0.19071	0.933318	0.29914	3.32644	93	41.5473
1987-09-01	79.3032	0.607493	0.259329	0.267852	4.30998	55	42.2746
1987-10-01	89.331		0.542464	0.194271	6.09712	83	51.8886
1987-11-01	92.05	1.26127	1.21791	0.266695	6.29696	57	51.4458
1987-12-01	190.369	0.934972	1.36082	1.90658	37.7502	127	110.334
1988-01-01	436.827	0.931485	2.24768	4.00542	100.153	39	248.352
1988-02-01	71.0248	0.149329	0.295988	0.582834	15.3594	64	39.681
1988-03-01	129.981	1.11991	0.728181	2.53545	19.2897	78	70.4292
1988-04-01	513.673	0.699524	2.29015	3.8598	83.6291	56	297.824
1988-05-01	104.214	0.874153	0.326829	0.857819	16.9977	83	59.5708
1988-06-01	66.9297	0.39077	0.352301	0.301972	3.46429	73	38.8339
1988-07-01	89.8424	0.258976	0.613517	0.80325	1.98389	67	48.0873
1988-08-01	67.1602	0.443214	0.953833	0.222067	2.06999	93	36.7175
1988-09-01	125.048		0.786078	0.751547	7.31235	111	70.5281
1988-10-01	55.4856	0.729474	0.394177	0.113495	3.12984	124	30.3138
1988-11-01	39.841	0.436907	0.336124	0.373471	3.13336	78	21.9792
1988-12-01	146.371	0.943613	0.716592	2.72328	22.1728	61	80.1342
1989-01-01	705.459	0.79761	4.03509	4.94208	177.746	73	390
1989-02-01	172.314	0.941694	1.33401	3.98567	49.7465	69	103.277
1989-03-01	231.991	0.973904	0.885859	2.46398	52.7116	28	135.801
1989-04-01	325.745	0.716532	0.429838	1.19163	76.0515	76	197.029
1989-05-01	85.6518	0.500098	0.290685	0.373225	13.6084	63	49.8431
1989-06-01	81.036	0.727084	0.310036	0.73275	5.04975	81	48.0051
1989-07-01	55.2332	0.354504	0.354349	0.310833	2.06482	51	30.8366
1989-08-01	44.6119	0.353676	0.460055	0.296558	1.91982	55	27.0978
1989-09-01	31.1481	0.280392	0.374113	0.425557	1.20395	28	18.7041
1989-10-01	35.3301	0.785335	0.427539	0.783139	0.974371	42	21.0793
1989-11-01	64.8418	0.34956	0.38712	1.11543	9.30071	42	37.9708
1989-12-01	200.672	0.720452	1.02825	2.61953	40.1094	33	118.124
1990-01-01	274.749	0.764379	1.41723	2.00831	74.1478	62	158.484
1990-02-01	219.408	0.657085	0.705732	1.3871	69.3642	68	130.17
1990-03-01	199.157	0.916341	0.940448	1.33616	55.3477	71	118.96
1990-04-01	72.7121	0.721753	0.220732	0.659659	19.8849	58	44.0477
1990-05-01	64.3541	1.00516	0.214117	0.589853	7.56486	58	40.962
1990-06-01	72.1809	0.337086	0.32704	0.546585	1.82195	42	42.1747
1990-07-01	83.2326		0.757811	1.01969	2.93987	30	45.9815
1990-08-01	63.8103	0.436948	0.697213	0.423594	3.38303	19	39.7517
1990-09-01	75.8699	0.47003	0.834599	0.326909	5.07036	54	45.4041
1990-10-01	177.176	0.467964	1.11507	0.655922	14.8607	83	94.8962
1990-11-01	172.23	0.900947	0.696884	0.824043	33.8852	56	98.6641
1990-12-01	222.605	0.462949	0.686112	1.3961	51.8028	87	127.568
1991-01-01	243.752		0.711048	1.65601	72.9367	66	143.751
1991-02-01	80.1218	0.454734	0.316965	0.609681	20.9093		48.1125
1991-03-01	254.153	0.715532	2.6916	3.5169	60.9479		162.82
1991-04-01	120.409	0.61637	0.665862	0.983797	34.7688		83.3161
1991-05-01	115.31	0.435371	0.432634	1.06739	25.1745		78.8557
1991-06-01	120.288	0.739549	0.34042	1.12451	9.38456		70.9919
1991-07-01	73.1508	0.447061	0.381698	0.331378	4.47974		42.6155
1991-08-01	60.7807	0.252828	0.737579	0.616	2.57747		37.5244
1991-09-01	44.5602	0.376726	0.607118	0.58349	1.23889		28.5353
1991-10-01	36.1897	0.248422	0.487492	0.337739	1.13748		22.1265
1991-11-01	61.0296	0.365785	0.453379	1.0571	4.49855		40.7832
1991-12-01	97.0365	0.540308	0.50529	1.81234	14.6268		68.4007
1992-01-01	221.616	0.531446	1.15082	2.63045	56.4053		138.387
1992-02-01	286.622	0.349744	1.12932	1.92429	79.7739	83	167.039
1992-03-01	248.323	0.449743	0.727196	2.65642	64.7835	51	153.728
1992-04-01	139.659	0.541929	0.23271	1.29946	34.0513	106	92.0822
1992-05-01	148.068	0.48774	0.306211	1.33258	29.005	49	98.4474
1992-06-01	48.0337	0.295182	0.0853554	0.577927	5.28136	65	30.8722
1992-07-01	37.4858	0.23585	0.0923219	0.273546	2.21573	70	23.7453
1992-08-01	27.264	0.292932	0.140575	0.166966	0.601885	63	18.7014
1992-09-01	22.5205	0.408824	0.150899	0.172197	0.377247	37	15.7344
1992-10-01	20.3161	0.491793	0.135891	0.175601	1.25415	30	13.8574
1992-11-01	24.929		0.188236	0.250475	2.29222	35	17.5698
1992-12-01	56.2583	0.52063	0.423866	0.602214	9.14613	36	40.212
1993-01-01	89.2825	0.313843	0.523632	0.890715	17.6343	48	62.48
1993-02-01	190.687	0.593548	0.81109	1.77916	39.4294	48	121.13
1993-03-01	250.843	0.447835	0.954532	1.42433	61.6827	70	159.535
1993-04-01	150.607	0.809022	0.498841	0.970719	28.2857	55	93.6264
1993-05-01	35.9651	0.908973	0.0804954	0.271475	6.40649	69	21.9214
1993-06-01	37.0889	0.308989	0.0384124	0.268886	3.33547	54	22.2294
1993-07-01	42.8981	0.368718	0.0941601	0.296322	2.62596	37	27.0762
1993-08-01	62.2744	0.398164	0.253667	0.432387	2.04087	27	40.0358
1993-09-01	77.7335		0.400371	0.416712	2.68003	58	56.7419
1993-10-01	84.0386	0.315077	0.384147	0.659778	5.95102	44	60.2867
1993-11-01	64.1754	0.372193	0.327702	0.853107	7.65088	66	47.0187
1993-12-01	76.8532	0.472616	0.350173	0.848904	11.6688	90	50.8204
1994-01-01	227.792	0.49215	1.19255	4.80268	38.8855	40	161.121
1994-02-01	85.5487	0.218565	0.322736	0.485318	13.5282	64	56.1711
1994-03-01	457.39	0.521786	1.33393	3.69592	98.8128	68	295.013
1994-04-01	495.936	0.535125	1.53848	2.91742	127.25	45	316.56
1994-05-01	75.4551	0.593174	0.293273	0.642603	8.29574	70	47.4736
1994-06-01	76.9529	0.690674	0.10525	0.456504	6.59395	89	44.0301
1994-07-01	56.8344		0.472091	0.225521	1.18273	79	34.8026
1994-08-01	41.7537	0.228562	0.228292	0.231768	0.724276	49	26.825
1994-09-01	35.7848	0.428589	0.194894	0.188607	0.950021	46	24.255
1994-10-01	35.892		0.228478	0.180937	1.6036	27	24.6374
1994-11-01	86.4771	0.710863	0.715439	0.523173	5.66335	24	60.5524
1994-12-01	176.41	0.602608	0.837066	3.39861	15.6714	57	109.266
1995-01-01	192.812	0.562482	1.00841	3.30218	29.7907	70	123.289
1995-02-01	523.492	0.927703	3.47585	9.40948	93.2721	47	357.069
1995-03-01	410.337	0.360072	1.98704	5.79875	76.5435	42	268.461
1995-04-01	278.946	0.481382	0.973533	1.93961	59.8294	72	172.686
1995-05-01	213.703	0.49595	0.325798	0.84466	32.0971	82	139.659
1995-06-01	135.177	0.360421	0.202224	1.74619	16.6016	72	89.1641
1995-07-01	75.7591	0.297447	0.358003	0.60353	3.79607	72	47.6271
1995-08-01	44.9117	0.386529	0.287406	0.610531	1.07985	75	28.8422
1995-09-01	41.7093	0.266914	0.238917	0.603206	1.08025	46	27.3786
1995-10-01	60.3516		0.308128	0.67228	1.29974	32	38.9051
1995-11-01	57.4218	0.238361	0.259092	0.506534	3.19116	28	35.176
1995-12-01	47.2924	0.49951	0.243837	0.35303	4.06395	63	28.5069
1996-01-01	39.1704	0.539471	0.183685	0.257984	3.86632	46	23.8874
1996-02-01	30.7133	0.616218	0.1277	0.985756	3.1673	98	19.4475
1996-03-01	48.5371	0.409666	0.280112	1.21353	5.87191	44	30.2053
1996-04-01	517.34	0.659867	2.23288	7.9006	86.7139	46	334.544
1996-05-01	108.422	0.977179	0.214309	1.03186	16.6089	102	68.9007
1996-06-01	75.4541	0.713812	0.0661639	0.675717	5.56058	76	48.88
1996-07-01	74.2652	0.469359	0.200414	0.487049	2.12261	97	45.7065
1996-08-01	43.4576	0.314685	0.156532	0.524549	0.649442	51	28.9103
1996-09-01	31.2288	0.2999	0.159843	0.355208	0.242725	44	20.556
1996-10-01	30.0798	0.18941	0.16753	0.189332	1.06141	39	19.9213
1996-11-01	41.8302	0.409141	0.177624	0.450369	3.24383	35	26.9618
1996-12-01	67.2797	0.471884	0.316843	0.558075	7.02094	19	41.6723
1997-01-01	62.8371	0.738713	0.3049	0.734432	9.56987	53	38.638
1997-02-01	284.784	1.12395	0.896577	2.80411	26.6021	60	170.816
1997-03-01	235.114	0.57975	0.774	1.56711	22.188	39	132.716
1997-04-01	177.675	0.77752	0.345556	1.15185	26.404	95	102.551
1997-05-01	204.111	0.585134	0.207842	0.994802	27.5525	65	123.363
1997-06-01	163.945	0.6243	0.0779766	0.79369	12.699	79	96.6972
1997-07-01	95.449	0.336968	0.192268	0.456636	2.80391	60	55.6331
1997-08-01	38.448	0.385189	0.122477	0.319802	0.739967	49	23.626
1997-09-01	34.7861	0.387018	0.120345	0.759555	0.762843	37	22.8341
1997-10-01	168.038	0.486256	0.968689	2.12003	5.87084	44	113.249
1997-11-01	253.985	0.634801	1.11552	3.24514	29.1387	35	156.498
1997-12-01	213.298	0.868235	0.600492	0.448966	18.0147	83	129.909
1998-01-01	417.305	1.23516	0.950347	2.23403	85.6022	84	246.255
1998-02-01	529.553	1.98187	1.16916	3.59032	79.3553	103	319.651
1998-03-01	266.983	0.603345	0.598512	1.32243	42.7166	90	158.336
1998-04-01	321.38	0.968979	0.435542	1.32737	39.6551	113	192.038
1998-05-01	186.806	1.48486	0.373256	0.720319	21.0202	81	113.687
1998-06-01	135.463	0.797284	0.197798	0.146517	7.32584	95	84.7899
1998-07-01	389.815	0.597568	0.930001	1.03333	8.95557	120	239.198
1998-08-01	245.139	0.331018	1.28242	1.05224	5.32697	76	152.234
1998-09-01	118.955	0.63035	0.468148	0.481763	3.83315	90	72.7299
1998-10-01	94.0866	0.25649	0.573636	0.278382	2.88505	107	58.5821
1998-11-01	234.552	0.770335	0.679955	1.55077	23.6195	63	138.068
1998-12-01	252.287	1.28437	0.803241	2.25911	30.5817	16	145.262
1999-01-01	492.925	0.643086	1.23331	5.53729	87.2543	97	291.314
1999-02-01	435.356	0.727743	1.20681	4.2803	99.2197	107	275.225
1999-03-01	741.841	0.945366	1.39079	8.02377	100.832	72	464.338
1999-04-01	374.293	0.797332	0.729448	3.63897	60.7873	60	229.733
1999-05-01	77.1947	0.776946	0.098638	0.305545	3.82596	83	46.127
1999-06-01	59.2408	1.11967	0.181129	0.352194	2.11317	102	38.8221
1999-07-01	61.1946	0.587153	0.345143	0.103802	0.91692	72	40.0472
1999-08-01	38.3598	1.42916	0.145524	0.0303174	0.875836	53	23.3931
1999-09-01	28.5936	0.418209	0.110325	0.0403629	0.172215	118	18.6865
1999-10-01	50.248	0.557924	0.341626	0.182201	1.20109	68	33.2969
1999-11-01	53.5658	0.17672	0.358401	1.17733	2.29792	60	32.835
1999-12-01	259.284	1.0384	0.95042	2.07486	26.8616	128	154.933
2000-01-01	218.538	1.46891	0.477478	1.64844	40.5856	197	131.58
2000-02-01	297.097	0.127002	0.879754	2.06689	71.8643	150	184.018
2000-03-01	293.736	0.551668	0.438077	1.39327	80.6222	115	186.067
2000-04-01	137.492	0.892164	0.13053	0.664302	28.8097	166	80.9335
2000-05-01	78.9547	0.682048	0.070799	0.350624	7.10013	150	46.8248
2000-06-01	74.6004	0.735126	0.105907	0.337578	1.7607	140	45.9665
2000-07-01	122.794	0.993054	0.293052	0.37611	4.56033	76	72.552
2000-08-01	156.158	0.959473	0.884063	0.73672	7.5582	86	94.7427
2000-09-01	86.756	1.65936	0.462354	0.386558	3.2289	270	52.6359
2000-10-01	37.326	0.42469	0.108116	0.226529	0.818594	141	23.8351
2000-11-01	129.095	0.491107	0.364149	0.673912	4.7765	102	82.1042
2000-12-01	145.841	0.503722	0.59016	1.145	16.0787	76	84.5889
2001-01-01	241.745	0.864472	0.939341	1.15748	46.6554	70	154.578
2001-02-01	313.075	0.900998	1.3396	0.992299	67.4763	68	191.416
2001-03-01	296.097	0.824562	0.638415	2.52213	52.3737	76	182.446
2001-04-01	313.035	1.38741	0.436192	1.48041	60.71	81	183.583
2001-05-01	145.565	0.692948	0.279116	0.427475	11.2401	130	87.3112
2001-06-01	149.482	0.792948	0.125612	0.573447	0.791903	105	94.816
2001-07-01	146.984	1.18007	0.725585	0.474682	13.8912	187	78.4858
2001-08-01	60.8587	0.370507	0.544729	0.414728	4.08666	105	36.9238
2001-09-01	78.3386	0.303709	0.520272	0.291936	2.1082	62	48.2699
2001-10-01	56.86	0.317846	0.297657	0.16799	3.43408	70	36.4561
2001-11-01	179.293	0.146104	0.35861		20.8553		147.184
2001-12-01	80.115	0.647858	0.255409	0.380007	13.165	78	50.7488
2002-01-01	526.949	1.96762	1.59374		51.3281		297.038
2002-02-01		1.69977	3.05113	13.8346	307.203	521	725.63
2002-03-01	414.56	0.805179	0.892956	1.74524	87.6317	179	256.774
2002-04-01	127.933	1.50919	0.14861	0.466745	16.7434	155	76.4453
2002-05-01	59.9055	0.545206	0.095531	0.14581	1.77612	124	34.9163
2002-06-01	45.7263	0.366427	0.32235		0.559635		25.909
2002-07-01	55.7646	0.824638	0.294753	0.346485	2.09455	228	27.8489
2002-08-01	18.2942	0.163822	0.114402	0.0793812	0.0952575	110	10.809
2002-09-01	12.9766	0.30505	0.0654093	0.117093	0.160777	104	8.97512
2002-10-01	20.4394	0.262993	0.0826449	0.101717	0.222188	75	14.716
2002-11-01	62.8241	0.543742	0.174914	0.585614	5.10272	52	39.6371
2002-12-01	48.5588	0.872822	0.0896884	0.284688	10.3807	90	26.7887
2003-01-01	59.6152	1.87238	0.45929	1.48324	8.67927	53	45.0974
2003-02-01	46.812	1.03478	0.215433	1.34967	9.97201	80	43.5535
2003-03-01	123.596	1.62225	1.49511	10.4907	27.0678	48	144.205
2003-04-01	125.521	1.03784	0.0608296	1.96006	26.0216	87	111.753
2003-05-01	211.384	0.525004	0.100233	1.05692	10.6783	130	114.862
2003-06-01		0.225639	0.156676	0.556783	0.512499	123	29.9733
2003-07-01	41.0561	0.743755	0.294002	0.154372	0.395471	79	30.1132
2003-08-01	20.4334	0.297458	0.22674	0.229926	0.165754	72	17.7019
2003-09-01	111.48	0.556188	0.697209	0.512636	4.02873	249	85.1668
2003-10-01	87.9895	0.373113	0.344025	0.742061	2.40409	90	55.6501
2003-11-01		0.912188	0.650144	0.435735	56.0231	178	160.103
2003-12-01		0.900905	0.658098	1.2081	82.0238	154	147.186
2004-01-01	141.949	1.10254	0.641937	3.27297	38.5765	88	104.645
2004-02-01	348.097	0.887359	0.959752	3.54727	103.434	110	230.223
2004-03-01	336.85	1.9051	2.43088	13.6303	93.9071	72	334.942
2004-04-01	152.677	0.90604	0.207793	0.709156	47.2162	124	120.703
2004-05-01	61.722	0.445753	0.129053	0.195185	4.83467	93	44.5872
2004-06-01	75.0195		0.270542	0.507181	1.73411	78	47.0868
2004-07-01	115.995		0.494795	0.330698	2.06687	211	57.9929
2004-08-01	41.1434		0.25203	0.198178	0.330081	132	24.9318
2004-09-01	34.0277		0.269415	0.204868	0.366704	81	32.4815
2004-10-01	114.37		0.435119	0.637832	3.74452	118	84.8542
2004-11-01	591.787		0.778666	1.97262	115.409	167	257.496
2004-12-01			0.819718	5.57481	80.0713	148	231.543
2005-01-01			0.747668		21.5993		192.302
2005-02-01	179.519		0.404724	1.10492	40.3483	151	86.2143
2005-03-01	128.249		0.437094	2.06769	25.4928	102	90.8795
2005-04-01	450.123		1.37778	4.90519	171.105	261	333.959
2005-05-01	398.977		0.188874	2.03983	63.9148	128	262.324
2005-06-01	170.054		0.477165	0.964483	12.2845	211	88.129
2005-07-01	31.8605		0.215478	0.111791	0.612058	154	19.4082
2005-08-01			0.296873	0.215126	0.0891696	97	37.3482
2005-09-01							16.6127
2005-10-01			0.128479	0.208344	0.322547	99	17.8621
2005-11-01			0.0925894	0.250059	0.540668	121	23.4665
2005-12-01			0.188944	0.70854	4.16689	127	58.5764
2006-01-01			0.182373	0.994764	16.1458		44.2826
2006-02-01	19.1604		0.0905762	0.409335	11.3046		20.1603
2006-03-01	76.7745		0.16208	1.40753	22.222		49.3663
2006-04-01	240.116		0.180087	1.60077	70.8342		213.778
2006-05-01	77.584		0.0646533	0.258613	5.38778		49.8868
2006-06-01	33.4845		0.0602721	0.089292	0.111615		25.8368
2006-07-01	12.867		0.0647945	0.0306357	0.0275721		10.6374
2006-08-01			0.12921	0.155856	0.130718		11.638
2006-09-01			0.0947598	0.0850409	0.194379		14.061
2006-10-01	36.0535		0.122324	0.137347	2.36522		19.8707
2006-11-01			0.49823	1.75846	22.6087		96.9168
2006-12-01	88.7126		0.558889	1.68554	88.269		102.677
2007-01-01	279.86		3.26503	1.78092	242.46		294.465
2007-02-01	260.609		0.677584	3.12731	158.972		201.087
2007-03-01	532.454		0.81643	2.83976	275.101		410.845
2007-04-01	125.449		0.103441	0.660259	25.7721		76.4189
2007-05-01	103.48		0.0599883	0.539894	10.138		69.4309
2007-06-01	75.2524		0.196052	0.237639	0.97036		45.8409
2007-07-01	66.8133		0.130927	0.242958	2.06514		46.8668
2007-08-01	67.1396		0.260166	0.0839245	0.109102		48.5674
2007-09-01	64.0377		0.375078	0.182965	1.3265		52.9413
2007-10-01	112.226		0.353944	0.420848	18.1504		74.9373
2007-11-01	206.114		0.564101	1.08481	35.6902		125.557
2007-12-01	347.546		0.675783	1.73773	128.109		223.473
2008-01-01	185.427		0.525377	2.93593	91.6319		178.846
2008-02-01	275.46		0.495828	1.46912	155.176		212.546
2008-03-01	326.006		0.346381	1.83378	138.553		235.826
2008-04-01	265.485		0.313498	1.18621	86.4237		196.132
2008-05-01	70.634		0.00415494	0.249296	9.55636		48.0896
2008-06-01	23.5142		0.0843746	0.207478	0.539444		16.0091
2008-07-01	17.5389		0.0318147	0.0367093			14.1625
2008-08-01	15.4449		0.1892	0.18019	0.205932		14.8967
2008-09-01			0.102288	0.189964	0.482217		16.9128
2008-10-01			0.0662922	0.159101	0.371236		20.4605
2008-11-01			0.161271	0.450058	7.12591		43.4083
2008-12-01	191.27		0.355216	1.09297	69.9503		126.502
2009-01-01	180.696		0.473549	3.11546	55.5797		144.234
2009-02-01	96.5902		0.282871	1.24187	30.9779		79.853
2009-03-01							199.694
2009-04-01	471.569		0.304238	1.77472	100.906		293.439
2009-05-01	58.2129		0.0466948	0.249039	2.95734		36.03
2009-06-01							46.94
2009-07-01							37.9352
2009-08-01							29.0041
2009-09-01							21.2518
2009-10-01							53.9932
2009-11-01							122.957
2009-12-01							148.455
2010-01-01							111.98
2010-02-01							42.0839
2010-03-01							379.508
2010-04-01							359.568
2010-05-01							102.49
2010-06-01							71.3031
2010-07-01	90.4501		0.113631		1.63628		52.6068
2010-08-01	72.2772		0.315914	0.287194	6.79693		55.4001
2010-09-01	83.6591		0.199188	0.448174	12.1007		57.6355
2010-10-01	67.2485		0.0142074		8.14559		54.8126
2010-11-01							160.347
2010-12-01							93.3876
2011-01-01							149.167
2011-02-01							193.583
2011-03-01							252.031
2011-04-01							342.076
2011-05-01	115.012		0.0893297	0.669973	7.14638	138	64.6193
2011-06-01							25.7065
2011-07-01							14.2341
2011-08-01	35.6667		0.100706	0.104902	1.78333	125	24.2829
2011-09-01							29.9251
2011-10-01	37.1486		0.109108	0.207825	2.10422	86	30.0672
2011-11-01							31.8574
2011-12-01							121.357
2012-01-01							172.348
2012-02-01	71.1245		0.178929		16.5957		51.7736
2012-03-01							275.512
2012-04-01							231.843
2012-05-01	210.642		0.200611	0.778234	21.5484	156	120.098
2012-06-01							66.1157
2012-07-01							52.5852
2012-08-01	38.3055		0.138708	0.165347	2.90736	140	31.8957
2012-09-01							28.7056
2012-10-01	181.815		0.316799	0.495859	4.2699	80	95.6519
2012-11-01
2012-12-01
2013-01-01
2013-02-01
2013-03-01
2013-04-01
2013-05-01
2013-06-01
2013-07-01
2013-08-01
2013-09-01
2013-10-01
2013-11-01						79
2013-12-01
2014-01-01
2014-02-01						62
2014-03-01						56
2014-04-01						108
2014-05-01						90
2014-06-01						100
2014-07-01						87
2014-08-01						141
2014-09-01						100
2014-10-01						348
2014-11-01						103
2014-12-01						102

## Sheet: TSI
	TSI (W/m2)
1980-01-01	1361.68
1980-02-01	1361.34
1980-03-01	1362.02
1980-04-01	1361.43
1980-05-01	1361.48
1980-06-01	1361.78
1980-07-01	1361.76
1980-08-01	1361.82
1980-09-01	1361.65
1980-10-01	1361.65
1980-11-01	1361.28
1980-12-01	1361.85
1981-01-01	1362.25
1981-02-01	1361.48
1981-03-01	1361.76
1981-04-01	1361.78
1981-05-01	1361.77
1981-06-01	1361.77
1981-07-01	1360.79
1981-08-01	1361.58
1981-09-01	1361.79
1981-10-01	1361.44
1981-11-01	1361.71
1981-12-01	1361.58
1982-01-01	1361.7
1982-02-01	1360.95
1982-03-01	1360.96
1982-04-01	1361.54
1982-05-01	1361.52
1982-06-01	1360.79
1982-07-01	1361.27
1982-08-01	1361.23
1982-09-01	1361.62
1982-10-01	1361.59
1982-11-01	1361.3
1982-12-01	1361.01
1983-01-01	1361.49
1983-02-01	1361.4
1983-03-01	1361.33
1983-04-01	1361.34
1983-05-01	1361.2
1983-06-01	1361.19
1983-07-01	1361.37
1983-08-01	1361.55
1983-09-01	1361.42
1983-10-01	1361.2
1983-11-01	1361.19
1983-12-01	1361.11
1984-01-01	1360.52
1984-02-01	1360.72
1984-03-01	1361.14
1984-04-01	1360.52
1984-05-01	1360.76
1984-06-01	1361.09
1984-07-01	1361.11
1984-08-01	1361.01
1984-09-01	1361
1984-10-01	1360.9
1984-11-01	1360.82
1984-12-01	1360.88
1985-01-01	1360.78
1985-02-01	1360.82
1985-03-01	1360.73
1985-04-01	1360.58
1985-05-01	1360.65
1985-06-01	1360.72
1985-07-01	1360.69
1985-08-01	1360.77
1985-09-01	1360.73
1985-10-01	1360.64
1985-11-01	1360.75
1985-12-01	1360.76
1986-01-01	1360.75
1986-02-01	1360.66
1986-03-01	1360.74
1986-04-01	1360.71
1986-05-01	1360.78
1986-06-01	1360.75
1986-07-01	1360.69
1986-08-01	1360.66
1986-09-01	1360.69
1986-10-01	1360.72
1986-11-01	1360.82
1986-12-01	1360.76
1987-01-01	1360.72
1987-02-01	1360.67
1987-03-01	1360.62
1987-04-01	1360.66
1987-05-01	1360.75
1987-06-01	1360.84
1987-07-01	1360.81
1987-08-01	1360.79
1987-09-01	1360.87
1987-10-01	1360.92
1987-11-01	1361.08
1987-12-01	1361.11
1988-01-01	1361.16
1988-02-01	1361.14
1988-03-01	1360.93
1988-04-01	1361.05
1988-05-01	1361.27
1988-06-01	1360.91
1988-07-01	1360.76
1988-08-01	1361.04
1988-09-01	1361.46
1988-10-01	1361.29
1988-11-01	1361.3
1988-12-01	1361.13
1989-01-01	1361.39
1989-02-01	1361.83
1989-03-01	1361.55
1989-04-01	1361.75
1989-05-01	1361.88
1989-06-01	1361.3
1989-07-01	1361.9
1989-08-01	1361.53
1989-09-01	1361.16
1989-10-01	1361.81
1989-11-01	1361.62
1989-12-01	1361.64
1990-01-01	1361.72
1990-02-01	1361.59
1990-03-01	1361.47
1990-04-01	1361.79
1990-05-01	1361.62
1990-06-01	1361.91
1990-07-01	1361.5
1990-08-01	1361.22
1990-09-01	1361.87
1990-10-01	1361.49
1990-11-01	1361.06
1990-12-01	1361.58
1991-01-01	1361.09
1991-02-01	1361.52
1991-03-01	1361.74
1991-04-01	1362.21
1991-05-01	1361.58
1991-06-01	1361.34
1991-07-01	1361.66
1991-08-01	1361.67
1991-09-01	1361.79
1991-10-01	1361
1991-11-01	1361.62
1991-12-01	1360.72
1992-01-01	1361.51
1992-02-01	1361.57
1992-03-01	1361.8
1992-04-01	1361.51
1992-05-01	1361.37
1992-06-01	1361.34
1992-07-01	1361.08
1992-08-01	1361.14
1992-09-01	1361.21
1992-10-01	1360.76
1992-11-01	1361.12
1992-12-01	1361.18
1993-01-01	1361.3
1993-02-01	1360.76
1993-03-01	1361.11
1993-04-01	1361.27
1993-05-01	1361.1
1993-06-01	1361.08
1993-07-01	1361.11
1993-08-01	1361.12
1993-09-01	1360.95
1993-10-01	1360.68
1993-11-01	1360.78
1993-12-01	1360.76
1994-01-01	1360.71
1994-02-01	1360.98
1994-03-01	1361.06
1994-04-01	1360.97
1994-05-01	1360.82
1994-06-01	1360.88
1994-07-01	1360.81
1994-08-01	1360.84
1994-09-01	1360.72
1994-10-01	1360.74
1994-11-01	1360.92
1994-12-01	1360.61
1995-01-01	1360.85
1995-02-01	1360.73
1995-03-01	1360.8
1995-04-01	1360.87
1995-05-01	1360.73
1995-06-01	1360.72
1995-07-01	1360.7
1995-08-01	1360.77
1995-09-01	1360.78
1995-10-01	1360.67
1995-11-01	1360.81
1995-12-01	1360.57
1996-01-01	1360.73
1996-02-01	1360.64
1996-03-01	1360.63
1996-04-01	1360.64
1996-05-01	1360.67
1996-06-01	1360.63
1996-07-01	1360.6
1996-08-01	1360.63
1996-09-01	1360.74
1996-10-01	1360.65
1996-11-01	1360.56
1996-12-01	1360.77
1997-01-01	1360.78
1997-02-01	1360.76
1997-03-01	1360.78
1997-04-01	1360.77
1997-05-01	1360.79
1997-06-01	1360.75
1997-07-01	1360.72
1997-08-01	1360.75
1997-09-01	1360.7
1997-10-01	1361
1997-11-01	1360.92
1997-12-01	1360.98
1998-01-01	1361.11
1998-02-01	1361.01
1998-03-01	1360.88
1998-04-01	1361.12
1998-05-01	1361.01
1998-06-01	1361.12
1998-07-01	1361.43
1998-08-01	1361.14
1998-09-01	1361.2
1998-10-01	1361.39
1998-11-01	1361.27
1998-12-01	1361.44
1999-01-01	1361.55
1999-02-01	1361.38
1999-03-01	1361.48
1999-04-01	1361.38
1999-05-01	1361.41
1999-06-01	1361.32
1999-07-01	1361.44
1999-08-01	1361.55
1999-09-01	1361.75
1999-10-01	1361.28
1999-11-01	1361.26
1999-12-01	1361.49
2000-01-01	1361.81
2000-02-01	1361.7
2000-03-01	1361.26
2000-04-01	1361.57
2000-05-01	1361.33
2000-06-01	1361.43
2000-07-01	1361.51
2000-08-01	1361.96
2000-09-01	1361.48
2000-10-01	1362.1
2000-11-01	1361.87
2000-12-01	1362.01
2001-01-01	1361.92
2001-02-01	1361.99
2001-03-01	1361.44
2001-04-01	1361.33
2001-05-01	1361.53
2001-06-01	1361.37
2001-07-01	1361.72
2001-08-01	1361.44
2001-09-01	1361.21
2001-10-01	1361.77
2001-11-01	1361.57
2001-12-01	1361.9
2002-01-01	1362.32
2002-02-01	1362.32
2002-03-01	1362.14
2002-04-01	1361.68
2002-05-01	1361.63
2002-06-01	1361.67
2002-07-01	1361.07
2002-08-01	1361.24
2002-09-01	1361.45
2002-10-01	1361.49
2002-11-01	1361.46
2002-12-01	1361.86
2003-01-01	1361.71
2003-02-01	1361.68
2003-03-01	1361.2
2003-04-01	1361.21
2003-05-01	1361.24
2003-06-01	1361.02
2003-07-01	1361.15
2003-08-01	1361.24
2003-09-01	1361.39
2003-10-01	1360.37
2003-11-01	1361.1
2003-12-01	1361.32
2004-01-01	1361.09
2004-02-01	1361.1
2004-03-01	1361.07
2004-04-01	1361.18
2004-05-01	1360.99
2004-06-01	1360.91
2004-07-01	1360.61
2004-08-01	1360.75
2004-09-01	1361.01
2004-10-01	1361.05
2004-11-01	1360.97
2004-12-01	1361.21
2005-01-01	1360.77
2005-02-01	1360.98
2005-03-01	1360.92
2005-04-01	1360.88
2005-05-01	1360.78
2005-06-01	1360.77
2005-07-01	1360.8
2005-08-01	1360.87
2005-09-01	1360.72
2005-10-01	1360.88
2005-11-01	1360.74
2005-12-01	1360.79
2006-01-01	1360.85
2006-02-01	1360.82
2006-03-01	1360.76
2006-04-01	1360.7
2006-05-01	1360.9
2006-06-01	1360.81
2006-07-01	1360.75
2006-08-01	1360.59
2006-09-01	1360.72
2006-10-01	1360.69
2006-11-01	1360.49
2006-12-01	1360.51
2007-01-01	1360.54
2007-02-01	1360.63
2007-03-01	1360.61
2007-04-01	1360.56
2007-05-01	1360.56
2007-06-01	1360.64
2007-07-01	1360.62
2007-08-01	1360.67
2007-09-01	1360.59
2007-10-01	1360.56
2007-11-01	1360.55
2007-12-01	1360.54
2008-01-01	1360.63
2008-02-01	1360.62
2008-03-01	1360.56
2008-04-01	1360.63
2008-05-01	1360.62
2008-06-01	1360.55
2008-07-01	1360.57
2008-08-01	1360.56
2008-09-01	1360.52
2008-10-01	1360.52
2008-11-01	1360.57
2008-12-01	1360.5
2009-01-01	1360.5
2009-02-01	1360.55
2009-03-01	1360.52
2009-04-01	1360.51
2009-05-01	1360.59
2009-06-01	1360.56
2009-07-01	1360.53
2009-08-01	1360.55
2009-09-01	1360.58
2009-10-01	1360.58
2009-11-01	1360.62
2009-12-01	1360.58
2010-01-01	1360.66
2010-02-01	1360.82
2010-03-01	1360.77
2010-04-01	1360.88
2010-05-01	1360.82
2010-06-01	1360.75
2010-07-01	1360.83
2010-08-01	1360.82
2010-09-01	1360.85
2010-10-01	1360.79
2010-11-01	1360.87
2010-12-01	1360.84
2011-01-01	1360.88
2011-02-01	1360.85
2011-03-01	1360.87
2011-04-01	1361.14
2011-05-01	1361.12
2011-06-01	1361.11
2011-07-01	1360.98
2011-08-01	1360.94
2011-09-01	1360.93
2011-10-01	1361.1
2011-11-01	1361.27
2011-12-01	1361.41
2012-01-01	1361.27
2012-02-01	1361.27
2012-03-01	1361.12
2012-04-01	1361.18
2012-05-01	1361.12
2012-06-01	1361.1
2012-07-01	1360.87
2012-08-01	1361.29
2012-09-01	1361.37
2012-10-01	1361.18
2012-11-01	1361.19
2012-12-01	1361.22
2013-01-01	1361.1
2013-02-01	1361.2
2013-03-01	1361.25
2013-04-01	1361.11
2013-05-01	1361.32
2013-06-01	1361.32
2013-07-01	1361.33
2013-08-01	1361.35
2013-09-01	1361.38
2013-10-01	1361.02
2013-11-01	1361.01
2013-12-01	1361.3
2014-01-01	1361.05
2014-02-01	1360.75
2014-03-01	1361.49
2014-04-01	1361.28
2014-05-01	1361.19
2014-06-01	1361.11
2014-07-01	1361.08
2014-08-01	1361.33
2014-09-01	1361.27
2014-10-01	1360.92
2014-11-01	1361.33
2014-12-01	1361.27
	1361.39
	1361.72
	1361.53
	1361.78
