# Supplementary material for: Decadal oscillations of the aquatic chemistry of river waters in Latvia
Source: Copernicus journal article supplement (doi:10.5194/piahs-374-193-2016), 2016-10-17
Supplement: Supplementary file [file piahs-374-193-2016-supplement-title-page.pdf › piahs-374-193-2016-supplement-title-page.pdf]

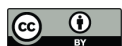

## *Supplement of*

# **Decadal oscillations of the aquatic chemistry of river waters in Latvia**

**Dmitry Porshnov and Maris Klavins**

*Correspondence to:* Dmitry Porshnov ([dmitrijs.porsnovs@lu.lv](mailto:dmitrijs.porsnovs@lu.lv))

- [piahs-374-193-2016-supplement-title-page.pdf](#)
- [Data.xlsx](#)

The copyright of individual parts of the supplement might differ from the CC-BY 3.0 licence.
